# Supplementary material for: Enhanced bio-production from CO2by microbial electrosynthesis (MES) with continuous operational mode
Source: Royal Society of Chemistry journal article supplement (doi:10.1039/d0fd00132e), 2021-01-01
Supplement: d0fd00132e1.pdf [file d0fd00132e1.pdf]

### Supplementary information

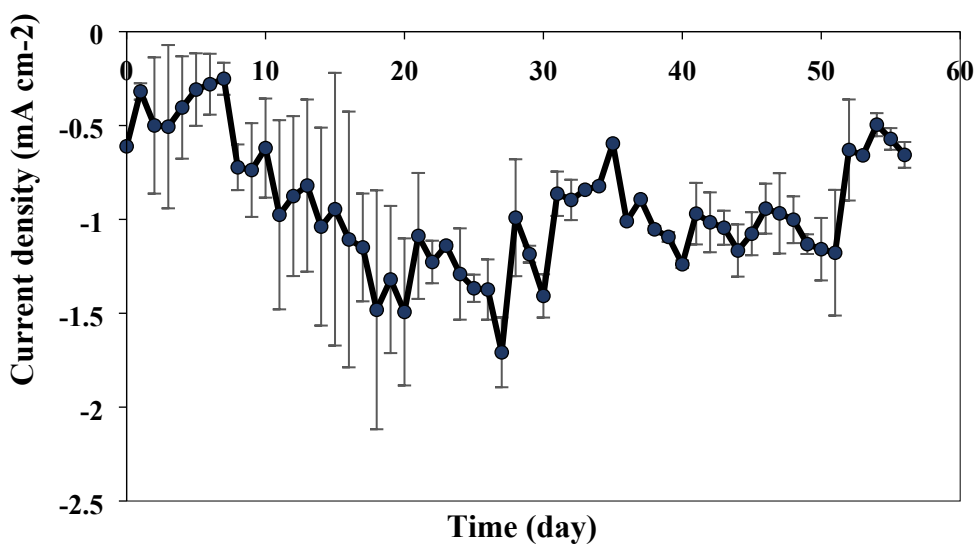

Fig. S1 Cathodic current density of the reactors at continuous operation mode, HRT: 3 days. The error bars represent the standard deviation calculated from duplicate samples in two reactors.

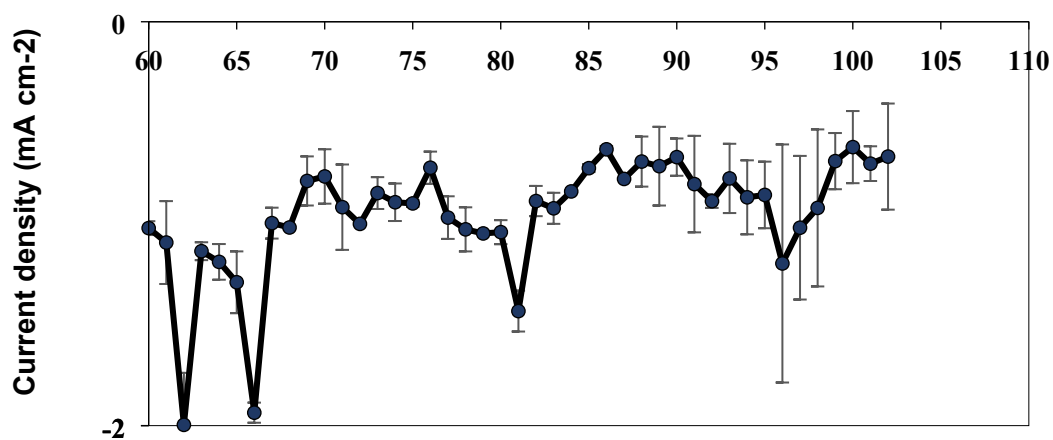

Fig. S2 Cathodic current density of the reactors at continuous operation mode, HRT: 7 days. The error bars represent the standard deviation calculated from duplicate samples in two reactors.

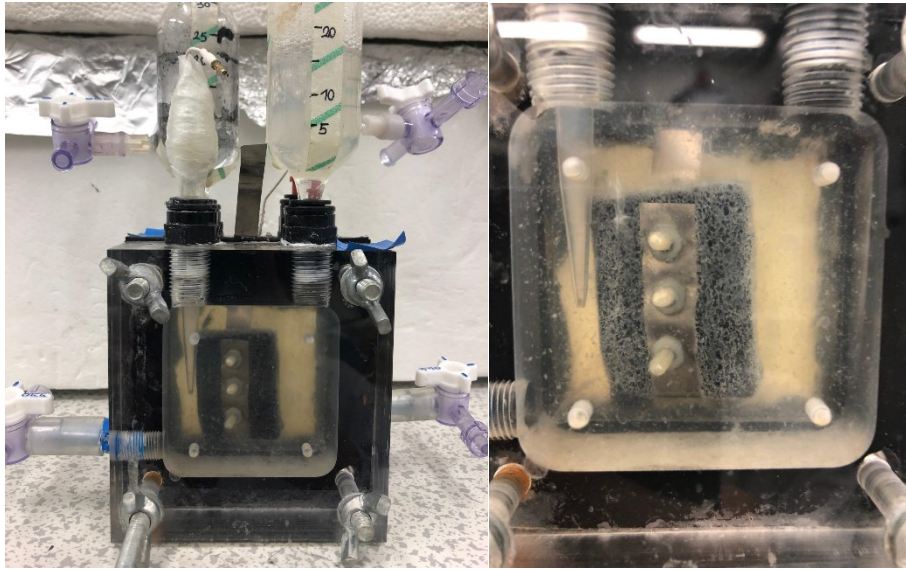

Fig. S3 Images of the biofilm at the surface of the cathodes (back side) on day 102 of the experiment.
